# Supplementary material
Source: publisher figshare collection journal article supplement (https://acs.figshare.com/ndownloader/files/4189021)
Supplement: Supplementary file 1 [file 4189021]

  
data_bdiii87s 
  
_audit_creation_method            SHELXL-97 
_chemical_name_systematic 
; 
 ? 
; 
_chemical_name_common             ? 
_chemical_melting_point           ? 
_chemical_formula_moiety 
 'C15 H14 N2 O2' 
_chemical_formula_sum 
 'C15 H14 N2 O2' 
_chemical_formula_weight          254.28 
  
loop_ 
 _atom_type_symbol 
 _atom_type_description 
 _atom_type_scat_dispersion_real 
 _atom_type_scat_dispersion_imag 
 _atom_type_scat_source 
 'C'  'C'   0.0033   0.0016 
 'International Tables Vol C Tables 4.2.6.8 and 6.1.1.4' 
 'H'  'H'   0.0000   0.0000 
 'International Tables Vol C Tables 4.2.6.8 and 6.1.1.4' 
 'N'  'N'   0.0061   0.0033 
 'International Tables Vol C Tables 4.2.6.8 and 6.1.1.4' 
 'O'  'O'   0.0106   0.0060 
 'International Tables Vol C Tables 4.2.6.8 and 6.1.1.4' 
  
_symmetry_cell_setting            Monoclinic 
_symmetry_space_group_name_H-M    'P 21/n' 
_symmetry_space_group_name_Hall   '-P 2yn' 
  
loop_ 
 _symmetry_equiv_pos_as_xyz 
 'x, y, z' 
 '-x+1/2, y+1/2, -z+1/2' 
 '-x, -y, -z' 
 'x-1/2, -y-1/2, z-1/2' 
  
_cell_length_a                    8.7323(4) 
_cell_length_b                    13.4187(6) 
_cell_length_c                    11.3803(5) 
_cell_angle_alpha                 90.00 
_cell_angle_beta                  101.9920(10) 
_cell_angle_gamma                 90.00 
_cell_volume                      1304.40(10) 
_cell_formula_units_Z             4 
_cell_measurement_temperature     100(2) 
_cell_measurement_reflns_used     7624 
_cell_measurement_theta_min       2.377 
_cell_measurement_theta_max       28.294 
  
_exptl_crystal_description        needle 
_exptl_crystal_colour             'light brown' 
_exptl_crystal_size_max           0.46 
_exptl_crystal_size_mid           0.24 
_exptl_crystal_size_min           0.18 
_exptl_crystal_density_meas       ? 
_exptl_crystal_density_diffrn     1.295 
_exptl_crystal_density_method     'not measured' 
_exptl_crystal_F_000              536 
_exptl_absorpt_coefficient_mu     0.088 
_exptl_absorpt_correction_type    none 
_exptl_absorpt_correction_T_min   ? 
_exptl_absorpt_correction_T_max   ? 
_exptl_absorpt_process_details    ? 
  
_exptl_special_details 
; 
 ? 
; 
  
_diffrn_ambient_temperature       100(2) 
_diffrn_radiation_wavelength      0.71073 
_diffrn_radiation_type            MoK\a 
_diffrn_radiation_source          'fine-focus sealed tube' 
_diffrn_radiation_monochromator   graphite 
_diffrn_measurement_device_type   'Bruker SMART APEX CCD diffractometer' 
_diffrn_measurement_method        'omega scans' 
_diffrn_detector_area_resol_mean  ? 
_diffrn_standards_number          ? 
_diffrn_standards_interval_count  ? 
_diffrn_standards_interval_time   ? 
_diffrn_standards_decay_%         ? 
_diffrn_reflns_number             22199 
_diffrn_reflns_av_R_equivalents   0.0287 
_diffrn_reflns_av_sigmaI/netI     0.0147 
_diffrn_reflns_limit_h_min        -10 
_diffrn_reflns_limit_h_max        10 
_diffrn_reflns_limit_k_min        -16 
_diffrn_reflns_limit_k_max        16 
_diffrn_reflns_limit_l_min        -14 
_diffrn_reflns_limit_l_max        14 
_diffrn_reflns_theta_min          2.38 
_diffrn_reflns_theta_max          26.37 
_reflns_number_total              2651 
_reflns_number_gt                 2495 
_reflns_threshold_expression      >2sigma(I) 
  
_computing_data_collection        'SMART Version 5.625 (Bruker, 2001)' 
_computing_cell_refinement        'SAINT-Plus Version 6.45 (Bruker, 2001)' 
_computing_data_reduction         'SAINT-Plus Version 6.45 (Bruker, 2001)' 
_computing_structure_solution     'SHELXS-97 (Sheldrick, 1990)' 
_computing_structure_refinement   'SHELXL-97 (Sheldrick, 1997)' 
_computing_molecular_graphics     various 
_computing_publication_material   'SHELXTL Version 6.14 (Bruker, 2000)' 
  
_refine_special_details 
; 
 Refinement of F^2^ against ALL reflections.  The weighted R-factor wR and 
 goodness of fit S are based on F^2^, conventional R-factors R are based 
 on F, with F set to zero for negative F^2^. The threshold expression of 
 F^2^ > 2sigma(F^2^) is used only for calculating R-factors(gt) etc. and is 
 not relevant to the choice of reflections for refinement.  R-factors based 
 on F^2^ are statistically about twice as large as those based on F, and R- 
 factors based on ALL data will be even larger. 
; 
  
_refine_ls_structure_factor_coef  Fsqd 
_refine_ls_matrix_type            full 
_refine_ls_weighting_scheme       calc 
_refine_ls_weighting_details 
 'calc w=1/[\s^2^(Fo^2^)+(0.0521P)^2^+0.4469P] where P=(Fo^2^+2Fc^2^)/3' 
_atom_sites_solution_primary      direct 
_atom_sites_solution_secondary    difmap 
_atom_sites_solution_hydrogens    geom 
_refine_ls_hydrogen_treatment     constr 
_refine_ls_extinction_method      none 
_refine_ls_extinction_coef        ? 
_refine_ls_number_reflns          2651 
_refine_ls_number_parameters      174 
_refine_ls_number_restraints      0 
_refine_ls_R_factor_all           0.0397 
_refine_ls_R_factor_gt            0.0380 
_refine_ls_wR_factor_ref          0.1009 
_refine_ls_wR_factor_gt           0.0991 
_refine_ls_goodness_of_fit_ref    1.056 
_refine_ls_restrained_S_all       1.056 
_refine_ls_shift/su_max           0.000 
_refine_ls_shift/su_mean          0.000 
  
loop_ 
 _atom_site_label 
 _atom_site_type_symbol 
 _atom_site_fract_x 
 _atom_site_fract_y 
 _atom_site_fract_z 
 _atom_site_U_iso_or_equiv 
 _atom_site_adp_type 
 _atom_site_occupancy 
 _atom_site_symmetry_multiplicity 
 _atom_site_calc_flag 
 _atom_site_refinement_flags 
 _atom_site_disorder_assembly 
 _atom_site_disorder_group 
C1 C 0.57380(14) 0.49784(8) 0.14654(10) 0.0247(3) Uani 1 1 d . . . 
C2 C 0.73402(14) 0.54241(8) 0.15620(11) 0.0271(3) Uani 1 1 d . . . 
H2A H 0.7444 0.6043 0.2045 0.033 Uiso 1 1 calc R . . 
H2B H 0.7530 0.5584 0.0755 0.033 Uiso 1 1 calc R . . 
C3 C 0.85065(13) 0.46339(8) 0.21785(10) 0.0236(2) Uani 1 1 d . . . 
C4 C 0.74913(13) 0.37153(8) 0.22084(9) 0.0217(2) Uani 1 1 d . . . 
C5 C 0.92081(16) 0.49056(10) 0.34877(11) 0.0359(3) Uani 1 1 d . . . 
H5A H 0.8362 0.5018 0.3919 0.054 Uiso 1 1 calc R . . 
H5B H 0.9836 0.5513 0.3512 0.054 Uiso 1 1 calc R . . 
H5C H 0.9874 0.4359 0.3869 0.054 Uiso 1 1 calc R . . 
C6 C 0.97978(15) 0.44046(11) 0.14949(13) 0.0370(3) Uani 1 1 d . . . 
H6A H 1.0431 0.3846 0.1881 0.055 Uiso 1 1 calc R . . 
H6B H 1.0465 0.4993 0.1502 0.055 Uiso 1 1 calc R . . 
H6C H 0.9325 0.4228 0.0663 0.055 Uiso 1 1 calc R . . 
C7 C 0.46684(12) 0.33034(8) 0.17939(10) 0.0224(2) Uani 1 1 d . . . 
C8 C 0.40806(13) 0.27123(9) 0.08284(10) 0.0258(3) Uani 1 1 d . . . 
H8 H 0.4478 0.2769 0.0115 0.031 Uiso 1 1 calc R . . 
C9 C 0.28828(14) 0.20161(9) 0.08879(11) 0.0297(3) Uani 1 1 d . . . 
H9 H 0.2459 0.1618 0.0207 0.036 Uiso 1 1 calc R . . 
C10 C 0.23325(13) 0.19144(9) 0.19222(11) 0.0286(3) Uani 1 1 d . . . 
H10 H 0.1562 0.1424 0.1969 0.034 Uiso 1 1 calc R . . 
C11 C 0.29036(13) 0.25344(8) 0.29244(10) 0.0241(2) Uani 1 1 d . . . 
C12 C 0.23394(14) 0.24828(9) 0.40018(11) 0.0283(3) Uani 1 1 d . . . 
H12 H 0.1585 0.1995 0.4095 0.034 Uiso 1 1 calc R . . 
C13 C 0.28898(15) 0.31408(9) 0.49053(11) 0.0292(3) Uani 1 1 d . . . 
H13 H 0.2519 0.3121 0.5633 0.035 Uiso 1 1 calc R . . 
C14 C 0.40170(14) 0.38504(9) 0.47415(10) 0.0270(3) Uani 1 1 d . . . 
H14 H 0.4367 0.4313 0.5372 0.032 Uiso 1 1 calc R . . 
C15 C 0.40687(12) 0.32592(8) 0.28628(10) 0.0219(2) Uani 1 1 d . . . 
N1 N 0.59352(11) 0.39725(7) 0.17609(8) 0.0218(2) Uani 1 1 d . . . 
N2 N 0.46191(11) 0.39151(7) 0.37724(8) 0.0241(2) Uani 1 1 d . . . 
O1 O 0.44749(10) 0.53766(6) 0.11683(8) 0.0317(2) Uani 1 1 d . . . 
O2 O 0.79215(10) 0.28970(6) 0.25821(8) 0.0283(2) Uani 1 1 d . . . 
  
loop_ 
 _atom_site_aniso_label 
 _atom_site_aniso_U_11 
 _atom_site_aniso_U_22 
 _atom_site_aniso_U_33 
 _atom_site_aniso_U_23 
 _atom_site_aniso_U_13 
 _atom_site_aniso_U_12 
C1 0.0300(6) 0.0202(5) 0.0243(5) -0.0004(4) 0.0064(4) 0.0030(4) 
C2 0.0305(6) 0.0195(5) 0.0303(6) 0.0013(4) 0.0038(5) -0.0016(4) 
C3 0.0240(6) 0.0221(5) 0.0246(5) 0.0010(4) 0.0047(4) -0.0022(4) 
C4 0.0234(5) 0.0217(5) 0.0202(5) -0.0004(4) 0.0051(4) 0.0011(4) 
C5 0.0402(7) 0.0334(7) 0.0300(6) -0.0010(5) -0.0022(5) -0.0086(6) 
C6 0.0327(7) 0.0367(7) 0.0459(7) 0.0075(6) 0.0183(6) 0.0013(5) 
C7 0.0197(5) 0.0199(5) 0.0269(6) 0.0016(4) 0.0036(4) 0.0024(4) 
C8 0.0250(6) 0.0271(6) 0.0262(6) -0.0014(4) 0.0073(4) 0.0040(5) 
C9 0.0257(6) 0.0292(6) 0.0332(6) -0.0097(5) 0.0038(5) -0.0008(5) 
C10 0.0226(6) 0.0252(6) 0.0383(7) -0.0051(5) 0.0069(5) -0.0037(4) 
C11 0.0210(5) 0.0204(5) 0.0305(6) 0.0005(4) 0.0045(4) 0.0013(4) 
C12 0.0277(6) 0.0228(6) 0.0357(6) 0.0019(5) 0.0096(5) -0.0030(4) 
C13 0.0348(6) 0.0275(6) 0.0271(6) 0.0021(5) 0.0108(5) -0.0013(5) 
C14 0.0308(6) 0.0255(6) 0.0240(5) -0.0008(4) 0.0039(4) -0.0018(5) 
C15 0.0209(5) 0.0191(5) 0.0246(5) 0.0014(4) 0.0023(4) 0.0028(4) 
N1 0.0222(5) 0.0198(5) 0.0240(5) 0.0012(3) 0.0057(4) 0.0007(4) 
N2 0.0240(5) 0.0227(5) 0.0249(5) -0.0003(4) 0.0035(4) -0.0011(4) 
O1 0.0301(5) 0.0259(5) 0.0388(5) 0.0022(3) 0.0064(4) 0.0084(3) 
O2 0.0271(4) 0.0221(4) 0.0347(5) 0.0046(3) 0.0042(3) 0.0027(3) 
  
_geom_special_details 
; 
 All esds (except the esd in the dihedral angle between two l.s. planes) 
 are estimated using the full covariance matrix.  The cell esds are taken 
 into account individually in the estimation of esds in distances, angles 
 and torsion angles; correlations between esds in cell parameters are only 
 used when they are defined by crystal symmetry.  An approximate (isotropic) 
 treatment of cell esds is used for estimating esds involving l.s. planes. 
; 
  
loop_ 
 _geom_bond_atom_site_label_1 
 _geom_bond_atom_site_label_2 
 _geom_bond_distance 
 _geom_bond_site_symmetry_2 
 _geom_bond_publ_flag 
C1 O1 1.2089(14) . ? 
C1 N1 1.3930(14) . ? 
C1 C2 1.5044(16) . ? 
C2 C3 1.5352(16) . ? 
C2 H2A 0.9900 . ? 
C2 H2B 0.9900 . ? 
C3 C4 1.5229(15) . ? 
C3 C6 1.5284(16) . ? 
C3 C5 1.5326(16) . ? 
C4 O2 1.2089(13) . ? 
C4 N1 1.3918(14) . ? 
C5 H5A 0.9800 . ? 
C5 H5B 0.9800 . ? 
C5 H5C 0.9800 . ? 
C6 H6A 0.9800 . ? 
C6 H6B 0.9800 . ? 
C6 H6C 0.9800 . ? 
C7 C8 1.3658(16) . ? 
C7 C15 1.4220(15) . ? 
C7 N1 1.4313(14) . ? 
C8 C9 1.4146(17) . ? 
C8 H8 0.9500 . ? 
C9 C10 1.3675(17) . ? 
C9 H9 0.9500 . ? 
C10 C11 1.4161(16) . ? 
C10 H10 0.9500 . ? 
C11 C12 1.4148(16) . ? 
C11 C15 1.4197(15) . ? 
C12 C13 1.3647(17) . ? 
C12 H12 0.9500 . ? 
C13 C14 1.4094(17) . ? 
C13 H13 0.9500 . ? 
C14 N2 1.3195(15) . ? 
C14 H14 0.9500 . ? 
C15 N2 1.3677(14) . ? 
  
loop_ 
 _geom_angle_atom_site_label_1 
 _geom_angle_atom_site_label_2 
 _geom_angle_atom_site_label_3 
 _geom_angle 
 _geom_angle_site_symmetry_1 
 _geom_angle_site_symmetry_3 
 _geom_angle_publ_flag 
O1 C1 N1 123.76(11) . . ? 
O1 C1 C2 128.70(11) . . ? 
N1 C1 C2 107.52(9) . . ? 
C1 C2 C3 106.10(9) . . ? 
C1 C2 H2A 110.5 . . ? 
C3 C2 H2A 110.5 . . ? 
C1 C2 H2B 110.5 . . ? 
C3 C2 H2B 110.5 . . ? 
H2A C2 H2B 108.7 . . ? 
C4 C3 C6 110.05(10) . . ? 
C4 C3 C5 106.73(9) . . ? 
C6 C3 C5 110.77(10) . . ? 
C4 C3 C2 103.61(9) . . ? 
C6 C3 C2 113.33(10) . . ? 
C5 C3 C2 111.91(10) . . ? 
O2 C4 N1 124.22(10) . . ? 
O2 C4 C3 127.11(10) . . ? 
N1 C4 C3 108.64(9) . . ? 
C3 C5 H5A 109.5 . . ? 
C3 C5 H5B 109.5 . . ? 
H5A C5 H5B 109.5 . . ? 
C3 C5 H5C 109.5 . . ? 
H5A C5 H5C 109.5 . . ? 
H5B C5 H5C 109.5 . . ? 
C3 C6 H6A 109.5 . . ? 
C3 C6 H6B 109.5 . . ? 
H6A C6 H6B 109.5 . . ? 
C3 C6 H6C 109.5 . . ? 
H6A C6 H6C 109.5 . . ? 
H6B C6 H6C 109.5 . . ? 
C8 C7 C15 121.35(10) . . ? 
C8 C7 N1 120.43(10) . . ? 
C15 C7 N1 118.20(10) . . ? 
C7 C8 C9 120.20(11) . . ? 
C7 C8 H8 119.9 . . ? 
C9 C8 H8 119.9 . . ? 
C10 C9 C8 120.17(11) . . ? 
C10 C9 H9 119.9 . . ? 
C8 C9 H9 119.9 . . ? 
C9 C10 C11 120.45(11) . . ? 
C9 C10 H10 119.8 . . ? 
C11 C10 H10 119.8 . . ? 
C12 C11 C10 122.78(11) . . ? 
C12 C11 C15 117.29(10) . . ? 
C10 C11 C15 119.92(11) . . ? 
C13 C12 C11 119.32(11) . . ? 
C13 C12 H12 120.3 . . ? 
C11 C12 H12 120.3 . . ? 
C12 C13 C14 118.93(11) . . ? 
C12 C13 H13 120.5 . . ? 
C14 C13 H13 120.5 . . ? 
N2 C14 C13 124.44(11) . . ? 
N2 C14 H14 117.8 . . ? 
C13 C14 H14 117.8 . . ? 
N2 C15 C11 123.11(10) . . ? 
N2 C15 C7 119.12(10) . . ? 
C11 C15 C7 117.77(10) . . ? 
C4 N1 C1 113.01(9) . . ? 
C4 N1 C7 122.41(9) . . ? 
C1 N1 C7 123.83(9) . . ? 
C14 N2 C15 116.86(10) . . ? 
  
loop_ 
 _geom_torsion_atom_site_label_1 
 _geom_torsion_atom_site_label_2 
 _geom_torsion_atom_site_label_3 
 _geom_torsion_atom_site_label_4 
 _geom_torsion 
 _geom_torsion_site_symmetry_1 
 _geom_torsion_site_symmetry_2 
 _geom_torsion_site_symmetry_3 
 _geom_torsion_site_symmetry_4 
 _geom_torsion_publ_flag 
O1 C1 C2 C3 170.63(11) . . . . ? 
N1 C1 C2 C3 -10.75(12) . . . . ? 
C1 C2 C3 C4 9.00(11) . . . . ? 
C1 C2 C3 C6 128.25(11) . . . . ? 
C1 C2 C3 C5 -105.62(11) . . . . ? 
C6 C3 C4 O2 56.00(15) . . . . ? 
C5 C3 C4 O2 -64.25(15) . . . . ? 
C2 C3 C4 O2 177.47(11) . . . . ? 
C6 C3 C4 N1 -125.87(10) . . . . ? 
C5 C3 C4 N1 113.88(10) . . . . ? 
C2 C3 C4 N1 -4.39(11) . . . . ? 
C15 C7 C8 C9 -1.92(17) . . . . ? 
N1 C7 C8 C9 176.77(10) . . . . ? 
C7 C8 C9 C10 -1.56(18) . . . . ? 
C8 C9 C10 C11 2.87(18) . . . . ? 
C9 C10 C11 C12 177.91(11) . . . . ? 
C9 C10 C11 C15 -0.76(17) . . . . ? 
C10 C11 C12 C13 -176.60(11) . . . . ? 
C15 C11 C12 C13 2.11(17) . . . . ? 
C11 C12 C13 C14 -0.47(18) . . . . ? 
C12 C13 C14 N2 -1.58(19) . . . . ? 
C12 C11 C15 N2 -2.02(16) . . . . ? 
C10 C11 C15 N2 176.72(10) . . . . ? 
C12 C11 C15 C7 178.68(10) . . . . ? 
C10 C11 C15 C7 -2.57(16) . . . . ? 
C8 C7 C15 N2 -175.40(10) . . . . ? 
N1 C7 C15 N2 5.88(15) . . . . ? 
C8 C7 C15 C11 3.92(16) . . . . ? 
N1 C7 C15 C11 -174.79(9) . . . . ? 
O2 C4 N1 C1 175.77(10) . . . . ? 
C3 C4 N1 C1 -2.43(12) . . . . ? 
O2 C4 N1 C7 5.35(16) . . . . ? 
C3 C4 N1 C7 -172.85(9) . . . . ? 
O1 C1 N1 C4 -172.88(10) . . . . ? 
C2 C1 N1 C4 8.42(12) . . . . ? 
O1 C1 N1 C7 -2.61(17) . . . . ? 
C2 C1 N1 C7 178.68(10) . . . . ? 
C8 C7 N1 C4 -94.25(13) . . . . ? 
C15 C7 N1 C4 84.48(13) . . . . ? 
C8 C7 N1 C1 96.38(13) . . . . ? 
C15 C7 N1 C1 -84.90(13) . . . . ? 
C13 C14 N2 C15 1.72(17) . . . . ? 
C11 C15 N2 C14 0.14(16) . . . . ? 
C7 C15 N2 C14 179.43(10) . . . . ? 
  
_diffrn_measured_fraction_theta_max    1.000 
_diffrn_reflns_theta_full              26.37 
_diffrn_measured_fraction_theta_full   1.000 
_refine_diff_density_max    0.290 
_refine_diff_density_min   -0.191 
_refine_diff_density_rms    0.042 
